# Supplementary material
Source: Research Square preprint supplement (doi:10.21203/rs.3.rs-8970844/v1)
Supplement: Supplementary file 1 [file c436321136832064b9080ee8.pdf]

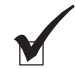

| Topic                                  | Item | Checklist item description                                                                             | Reported on Line                     |
|----------------------------------------|------|--------------------------------------------------------------------------------------------------------|--------------------------------------|
| <b>Title</b>                           | 1    | The diagnosis or intervention of primary focus followed by the words “case report”                     | Reported on Line: <b>1-2</b> _____   |
| <b>Key Words</b>                       | 2    | 2 to 5 key words that identify diagnoses or interventions in this case report, including "case report" | Reported on Line: <b>31-32</b> _____ |
| <b>Abstract (no references)</b>        | 3a   | Introduction: What is unique about this case and what does it add to the scientific literature?        | Reported on Line: <b>11-13</b> _____ |
|                                        | 3b   | Main symptoms and/or important clinical findings                                                       | Reported on Line: <b>14-16</b> _____ |
|                                        | 3c   | The main diagnoses, therapeutic interventions, and outcomes                                            | Reported on Line <b>18-26</b> _____  |
|                                        | 3d   | Conclusion—What is the main “take-away” lesson(s) from this case?                                      | Reported on Line <b>27-30</b> _____  |
| <b>Introduction</b><br><b>47</b> _____ | 4    | One or two paragraphs summarizing why this case is unique ( <b>may include references</b> )            | Reported on Line <b>33-47</b> _____  |
| <b>Patient Information</b>             | 5a   | De-identified patient specific information                                                             | Reported on Line <b>49-50</b> _____  |
|                                        | 5b   | Primary concerns and symptoms of the patient                                                           | Reported on Line <b>49-50</b> _____  |
|                                        | 5c   | Medical, family, and psycho-social history including relevant genetic information                      | <b>Reported on Line 49 - 70</b>      |
|                                        | 5d   | Relevant past interventions with outcomes.....                                                         | <b>N / A</b>                         |
| <b>Clinical Findings</b>               | 6    | Describe significant physical examination (PE) and important clinical findings .....                   | <b>N / A</b>                         |
| <b>Timeline</b>                        | 7    | Historical and current information from this episode of care organized as a timeline .....             | <b>Reported on Line 62 - 82</b>      |
| <b>Diagnostic Assessment</b>           | 8a   | Diagnostic testing (such as PE, laboratory testing, imaging, surveys).....                             | <b>Reported on Line 49 - 78</b>      |
|                                        | 8b   | Diagnostic challenges (such as access to testing, financial, or cultural) .....                        |                                      |
| <b>Therapeutic Intervention</b>        | 8c   | Diagnosis (including other diagnoses considered)                                                       | Reported on Line <b>81-84</b>        |
|                                        | 8d   | Prognosis (such as staging in oncology) where applicable.....                                          | <b>N / A</b>                         |
| <b>Follow-up and Outcomes</b>          | 9a   | Types of therapeutic intervention (such as pharmacologic, surgical, preventive, self-care) .....       | <b>N/A</b> _____                     |
|                                        | 9b   | Administration of therapeutic intervention (such as dosage, strength, duration) .....                  | Reported on Line <b>84-90</b> _____  |
|                                        | 9c   | Changes in therapeutic intervention (with rationale) .....                                             | Reported on Line <b>84-90</b> _____  |
|                                        | 10a  | Clinician and patient-assessed outcomes (if available).....                                            | <b>N/A</b>                           |
|                                        | 10b  | Important follow-up diagnostic and other test results .....                                            | Reported on Line <b>89-90</b> _____  |
|                                        | 10c  | Intervention adherence and tolerability (How was this assessed?).....                                  |                                      |
|                                        | 10d  | Adverse and unanticipated events.....                                                                  | <b>N/A</b> _____                     |

|                            |            |                                                                                                                 |                                   |
|----------------------------|------------|-----------------------------------------------------------------------------------------------------------------|-----------------------------------|
| <b>Discussion</b>          | <b>11a</b> | A scientific discussion of the strengths AND limitations associated with this case report.....                  | Reported on Line <b>91-115</b> _  |
|                            | <b>11b</b> | Discussion of the relevant medical literature <b>with references</b> .....                                      | Reported on Line <b>92-101</b> _  |
|                            | <b>11c</b> | The scientific rationale for any conclusions (including assessment of possible causes).....                     | Reported on Line <b>116-133</b> . |
|                            | <b>11d</b> | The primary “take-away” lessons of this case report (without references) in a one paragraph conclusion.....     | Reported on Line <b>128-132</b> . |
| <b>Patient Perspective</b> | <b>12</b>  | The patient should share their perspective in one to two paragraphs on the treatment(s) they received . . . . . | N/A_____                          |
| <b>Informed Consent</b>    | <b>13</b>  | Did the patient give informed consent? Please provide if requested .....                                        | <b>Yes +</b>                      |
